# Supplementary material for: Efficient removal of crystal violet by diatomite and carbon in the fixed bed column: influence of different glucose/diatomite
Source: Royal Society of Chemistry journal article supplement (doi:10.1039/c6ra07862a), 2016-01-01
Supplement: c6ra07862a1.pdf [file c6ra07862a1.pdf]

3. Figure 3

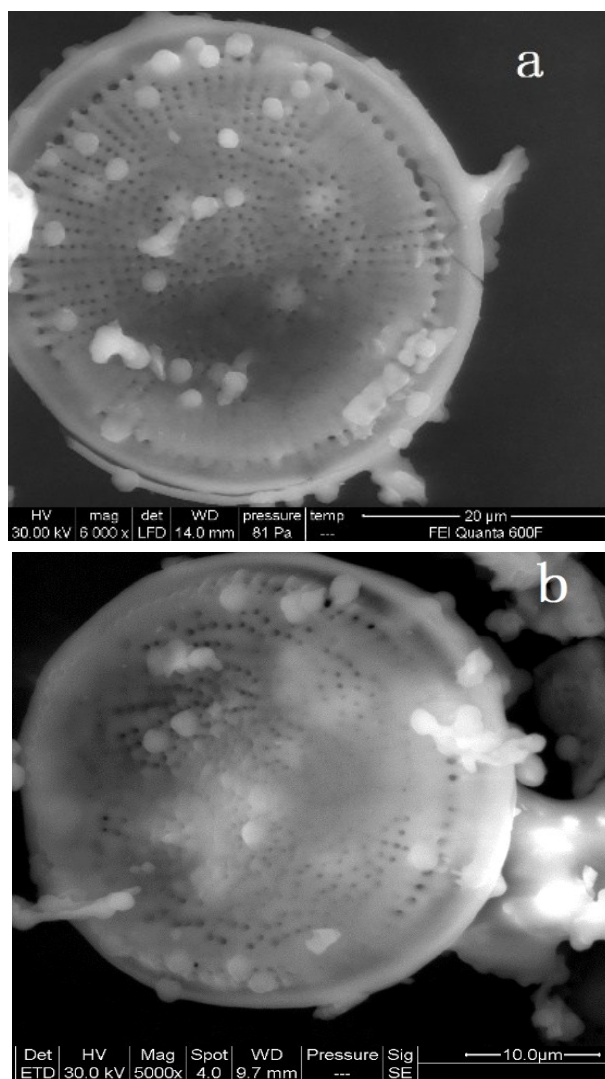

Fig. 3 SEM image of (a) raw diatomite and (b) glucose modified diatomite.

4. Figure 4

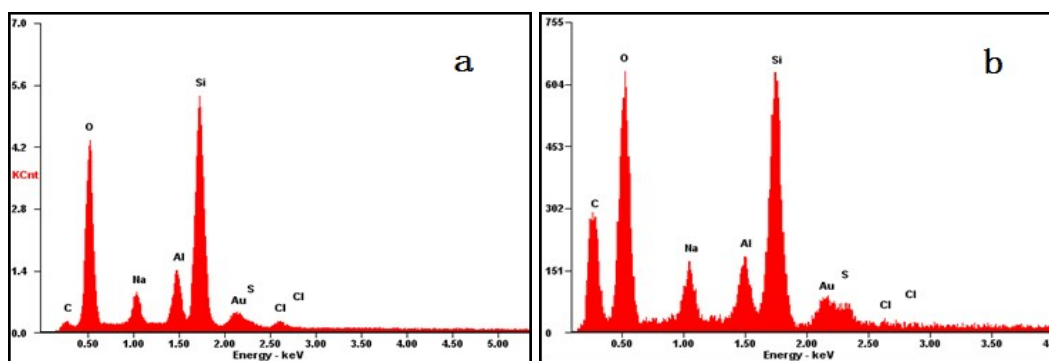

Fig. 4 EDS image of (a) raw diatomite and (b) glucose modified diatomite.

5. Figure 5

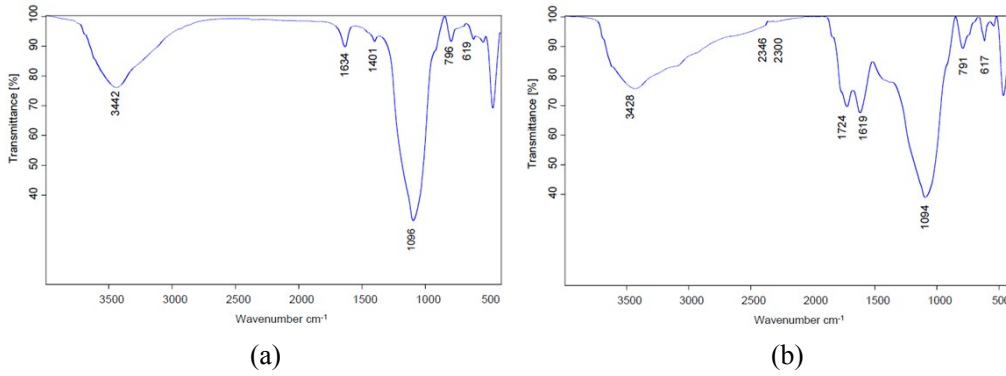

Fig. 5 FTIR spectra of adsorbents: (a) raw diatomite, (b) DE&C

6. Figure 6

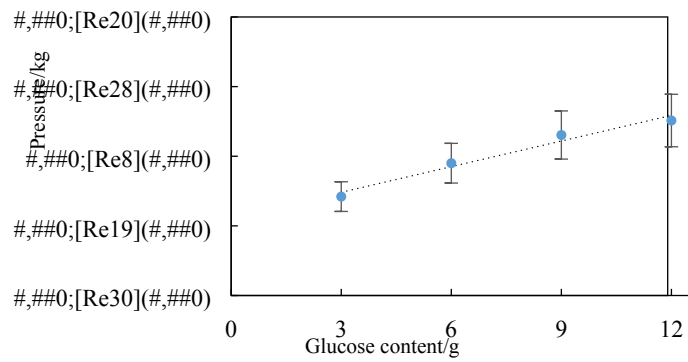

Fig. 6 Relationship of different chitosan contents and compression strength for DE@C adsorbent.

7. Figure 7

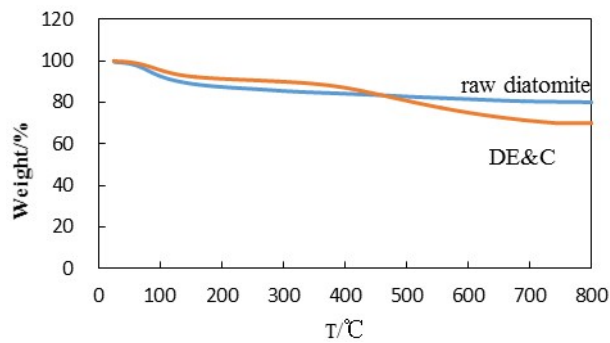

Fig. 7 TGA curves obtained in air for raw diatomite and DE&C

**8. Figure 8**

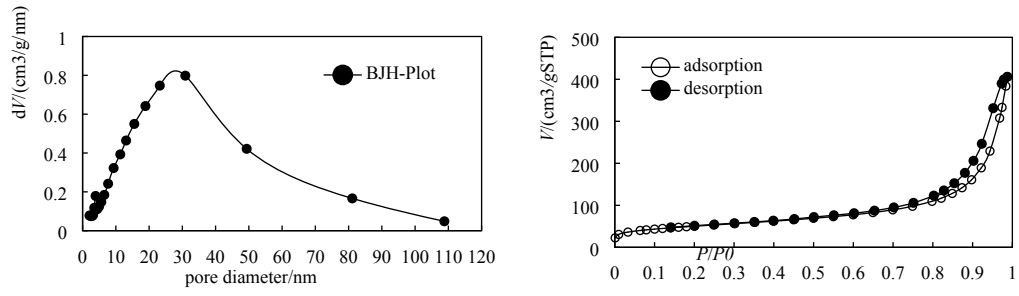

**Fig. 8 (a)  $\text{N}_2$  adsorption/desorption isotherm of DE&C and (b) BJH pore size distribution**

**10. Figure 10**

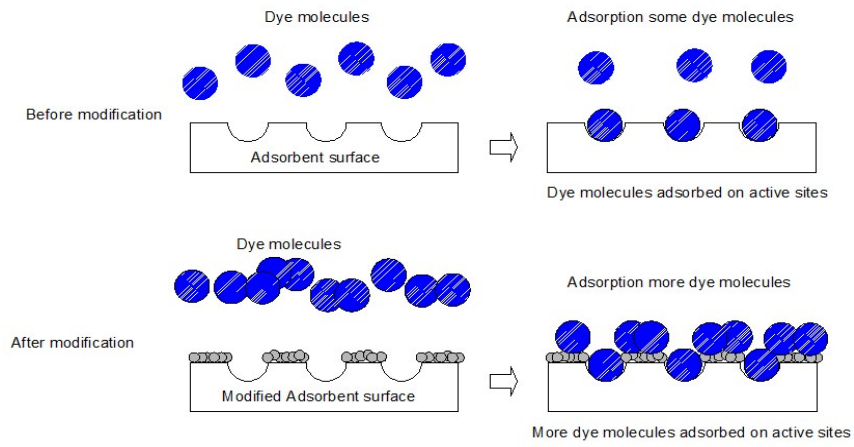

**Fig. 10 Chemical phenomenon of dye adsorbed on the surface of DE&C**
